# Supplementary material
Source: PubMed Central journal article supplement (PMC5017925)
Supplement: NIHMS810568-supplement-10.pdf [file NIHMS810568-supplement-10.pdf]

**Table S1. Control genes.**

| <b>ToxoDB ID</b> | <b>Name</b>    | <b>Category</b>   | <b>PMID</b> |
|------------------|----------------|-------------------|-------------|
| TGGT1_292055     | <i>CDPK8</i>   | dispensable       | 26755159    |
| TGGT1_295760     | <i>CDPK4A</i>  | dispensable       | 26755159    |
| TGGT1_217600     | <i>CDPK9</i>   | dispensable       | 26755159    |
| TGGT1_240390     | <i>CDPK4B</i>  | dispensable       | 26755159    |
| TGGT1_232130     | <i>TLAP1</i>   | dispensable       | 26680740    |
| TGGT1_235380     | <i>TLAP3</i>   | dispensable       | 26680740    |
| TGGT1_225490     | <i>CDPK2</i>   | dispensable       | 26651943    |
| TGGT1_205380     | <i>FBP1</i>    | dispensable       | 26269956    |
| TGGT1_297880     | <i>GRA23</i>   | dispensable       | 25974303    |
| TGGT1_255190     | <i>MYOC</i>    | dispensable       | 25393004    |
| TGGT1_283510     | <i>IAP1</i>    | dispensable       | 25393004    |
| TGGT1_246940     | <i>GAP80</i>   | dispensable       | 25393004    |
| TGGT1_228400     | <i>PX4</i>     | dispensable       | 25329540    |
| TGGT1_243400     | <i>PX1</i>     | dispensable       | 25329540    |
| TGGT1_309870     | <i>PX3</i>     | dispensable       | 25329540    |
| TGGT1_253770     | <i>MAF1</i>    | dispensable       | 24781109    |
| TGGT1_306620     | <i>AP2IX-9</i> | dispensable       | 23572590    |
| TGGT1_305860     | <i>CDPK3</i>   | dispensable       | 23226109    |
| TGGT1_205480     | <i>ISP4</i>    | dispensable       | 22659420    |
| TGGT1_310160     | <i>AGO</i>     | dispensable       | 22309152    |
| TGGT1_286590     | <i>SPM2</i>    | dispensable       | 22021240    |
| TGGT1_201840     | <i>ASP1</i>    | dispensable       | 21616070    |
| TGGT1_205250     | <i>ROP18</i>   | dispensable       | 21147463    |
| TGGT1_233030     | <i>GAP70</i>   | dispensable       | 20951968    |
| TGGT1_260820     | <i>ISP1</i>    | dispensable       | 20844581    |
| TGGT1_262730     | <i>ROP16</i>   | dispensable       | 20624917    |
| TGGT1_204130     | <i>PLP1</i>    | dispensable       | 19095897    |
| TGGT1_277080     | <i>MIC5</i>    | dispensable       | 16980407    |
| TGGT1_263180     | <i>MYOD</i>    | dispensable       | 16470333    |
| TGGT1_250880     | <i>AK</i>      | dispensable       | 15140885    |
| TGGT1_227620     | <i>GRA2</i>    | dispensable       | 9712765     |
| TGGT1_312480     | <i>UPRT</i>    | dispensable       | 9566522     |
| TGGT1_309590     | <i>ROP1</i>    | dispensable       | 8235614     |
| TGGT1_233460     | <i>SAG1</i>    | dispensable       | 7821410     |
| TGGT1_315760     | <i>AP2XI-4</i> | dispensable       | 23240624    |
| TGGT1_294690     | <i>ROM5</i>    | dispensable       | 25336455    |
| TGGT1_254555     | <i>GCN5-A</i>  | dispensable       | 16400169    |
| TGGT1_282055     | <i>PP2Chn</i>  | dispensable       | 17085638    |
| TGGT1_254470     | <i>MYR1</i>    | dispensable       | 26838724    |
| TGGT1_319560     | <i>MIC3</i>    | dispensable       | 15684324    |
| TGGT1_289910     | <i>HAD2a</i>   | essential (other) | 26840427    |
| TGGT1_203010     | <i>ARK3</i>    | essential (other) | 26833682    |
| TGGT1_254120     | <i>ATG8</i>    | essential (other) | 26507233    |
| TGGT1_247510     | <i>FBP2</i>    | essential (other) | 26269956    |
| TGGT1_312570     | <i>MAPKL1</i>  | essential (other) | 25734885    |
| TGGT1_274000     | <i>SFI1</i>    | essential (other) | 25734885    |
| TGGT1_313380     | <i>ILP1</i>    | essential (other) | 25691595    |
| TGGT1_215700     | <i>PI3K</i>    | essential (other) | 25329540    |
| TGGT1_256960     | <i>PIKfyve</i> | essential (other) | 25329540    |

|              |               |                            |          |
|--------------|---------------|----------------------------|----------|
| TGGT1_311470 | <i>RON5</i>   | essential (other)          | 24651769 |
| TGGT1_243440 | <i>GCN5B</i>  | essential (overexpression) | 24391497 |
| TGGT1_228750 | <i>CDPK7</i>  | essential (other)          | 24011186 |
| TGGT1_267810 | <i>RAB5A</i>  | essential (overexpression) | 23505371 |
| TGGT1_312050 | <i>RAB2</i>   | essential (overexpression) | 23505371 |
| TGGT1_257340 | <i>RAB4</i>   | essential (overexpression) | 23505371 |
| TGGT1_261440 | <i>ARO</i>    | essential (other)          | 23498954 |
| TGGT1_240910 | <i>DOC2.1</i> | essential (other)          | 22246776 |
| TGGT1_253040 | <i>ARP4A</i>  | essential (other)          | 21963440 |
| TGGT1_216080 | <i>AKMT</i>   | essential (other)          | 21909263 |
| TGGT1_223940 | <i>GAP45</i>  | essential (other)          | 20951968 |
| TGGT1_301440 | <i>CDPK1</i>  | essential (other)          | 20485436 |
| TGGT1_255370 | <i>TIC20</i>  | essential (other)          | 18757752 |
| TGGT1_245490 | <i>MIC8</i>   | essential (other)          | 18319299 |
| TGGT1_293690 | <i>PFR</i>    | essential (other)          | 18312842 |
| TGGT1_235470 | <i>MYOA</i>   | essential (other)          | 12399593 |
| TGGT1_243250 | <i>MYOH</i>   | essential (other)          | 26760042 |
| TGGT1_311310 | <i>CNA</i>    | essential (other)          | 26118996 |
| TGGT1_249970 | <i>APH</i>    | essential (other)          | 26962945 |
| TGGT1_227970 | <i>HU</i>     | essential (other)          | 22611021 |
| TGGT1_220400 | <i>ADF</i>    | essential (other)          | 21346192 |
| TGGT1_261070 | <i>APT1</i>   | essential (other)          | 20036630 |
| TGGT1_287270 | <i>PPP1</i>   | essential (other)          | 22144892 |
| TGGT1_278870 | <i>MYOF</i>   | essential (other)          | 23695356 |
| TGGT1_209030 | <i>ACT1</i>   | essential (other)          | 26081631 |
| TGGT1_462965 | <i>FRM1</i>   | essential (other)          | 20949068 |
| TGGT1_310440 | <i>MORN1</i>  | essential (other)          | 20808817 |
| TGGT1_236110 | <i>ATG3</i>   | essential (other)          | 22144900 |
| TGGT1_290160 | <i>SORTLR</i> | essential (other)          | 22607804 |
| TGGT1_311360 | <i>PKG</i>    | essential (other)          | 15003497 |
| TGGT1_244380 | <i>CACTIN</i> | essential (other)          | 22486860 |
